# Supplementary material for: Photoreceptor degeneration in ABCA4-associated retinopathy and its genetic correlates
Source: JCI journal article supplement (doi:10.1172/jci.insight.155373), 2022-01-24
Supplement: sd3 [file 3]

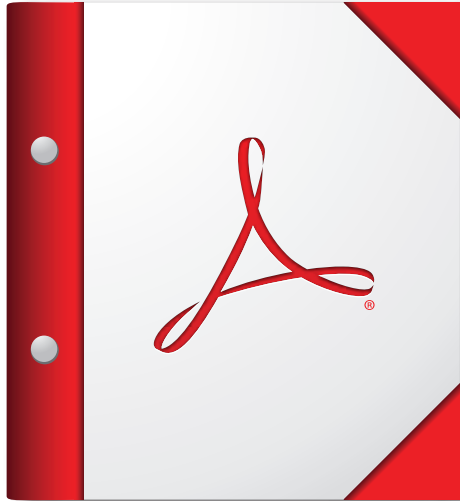

**For the best experience, open this PDF portfolio in  
Acrobat X or Adobe Reader X, or later.**

[Get Adobe Reader Now!](#)
